# Supplementary material for: Comparison of performance of specific (SLEQOL) and generic (SF36) health-related quality of life questionnaires and their associations with disease status of systemic lupus erythematosus: a longitudinal study
Source: PubMed Central journal article supplement (PMC6954627; doi:10.1186/s13075-020-2095-4), 2020-01-10

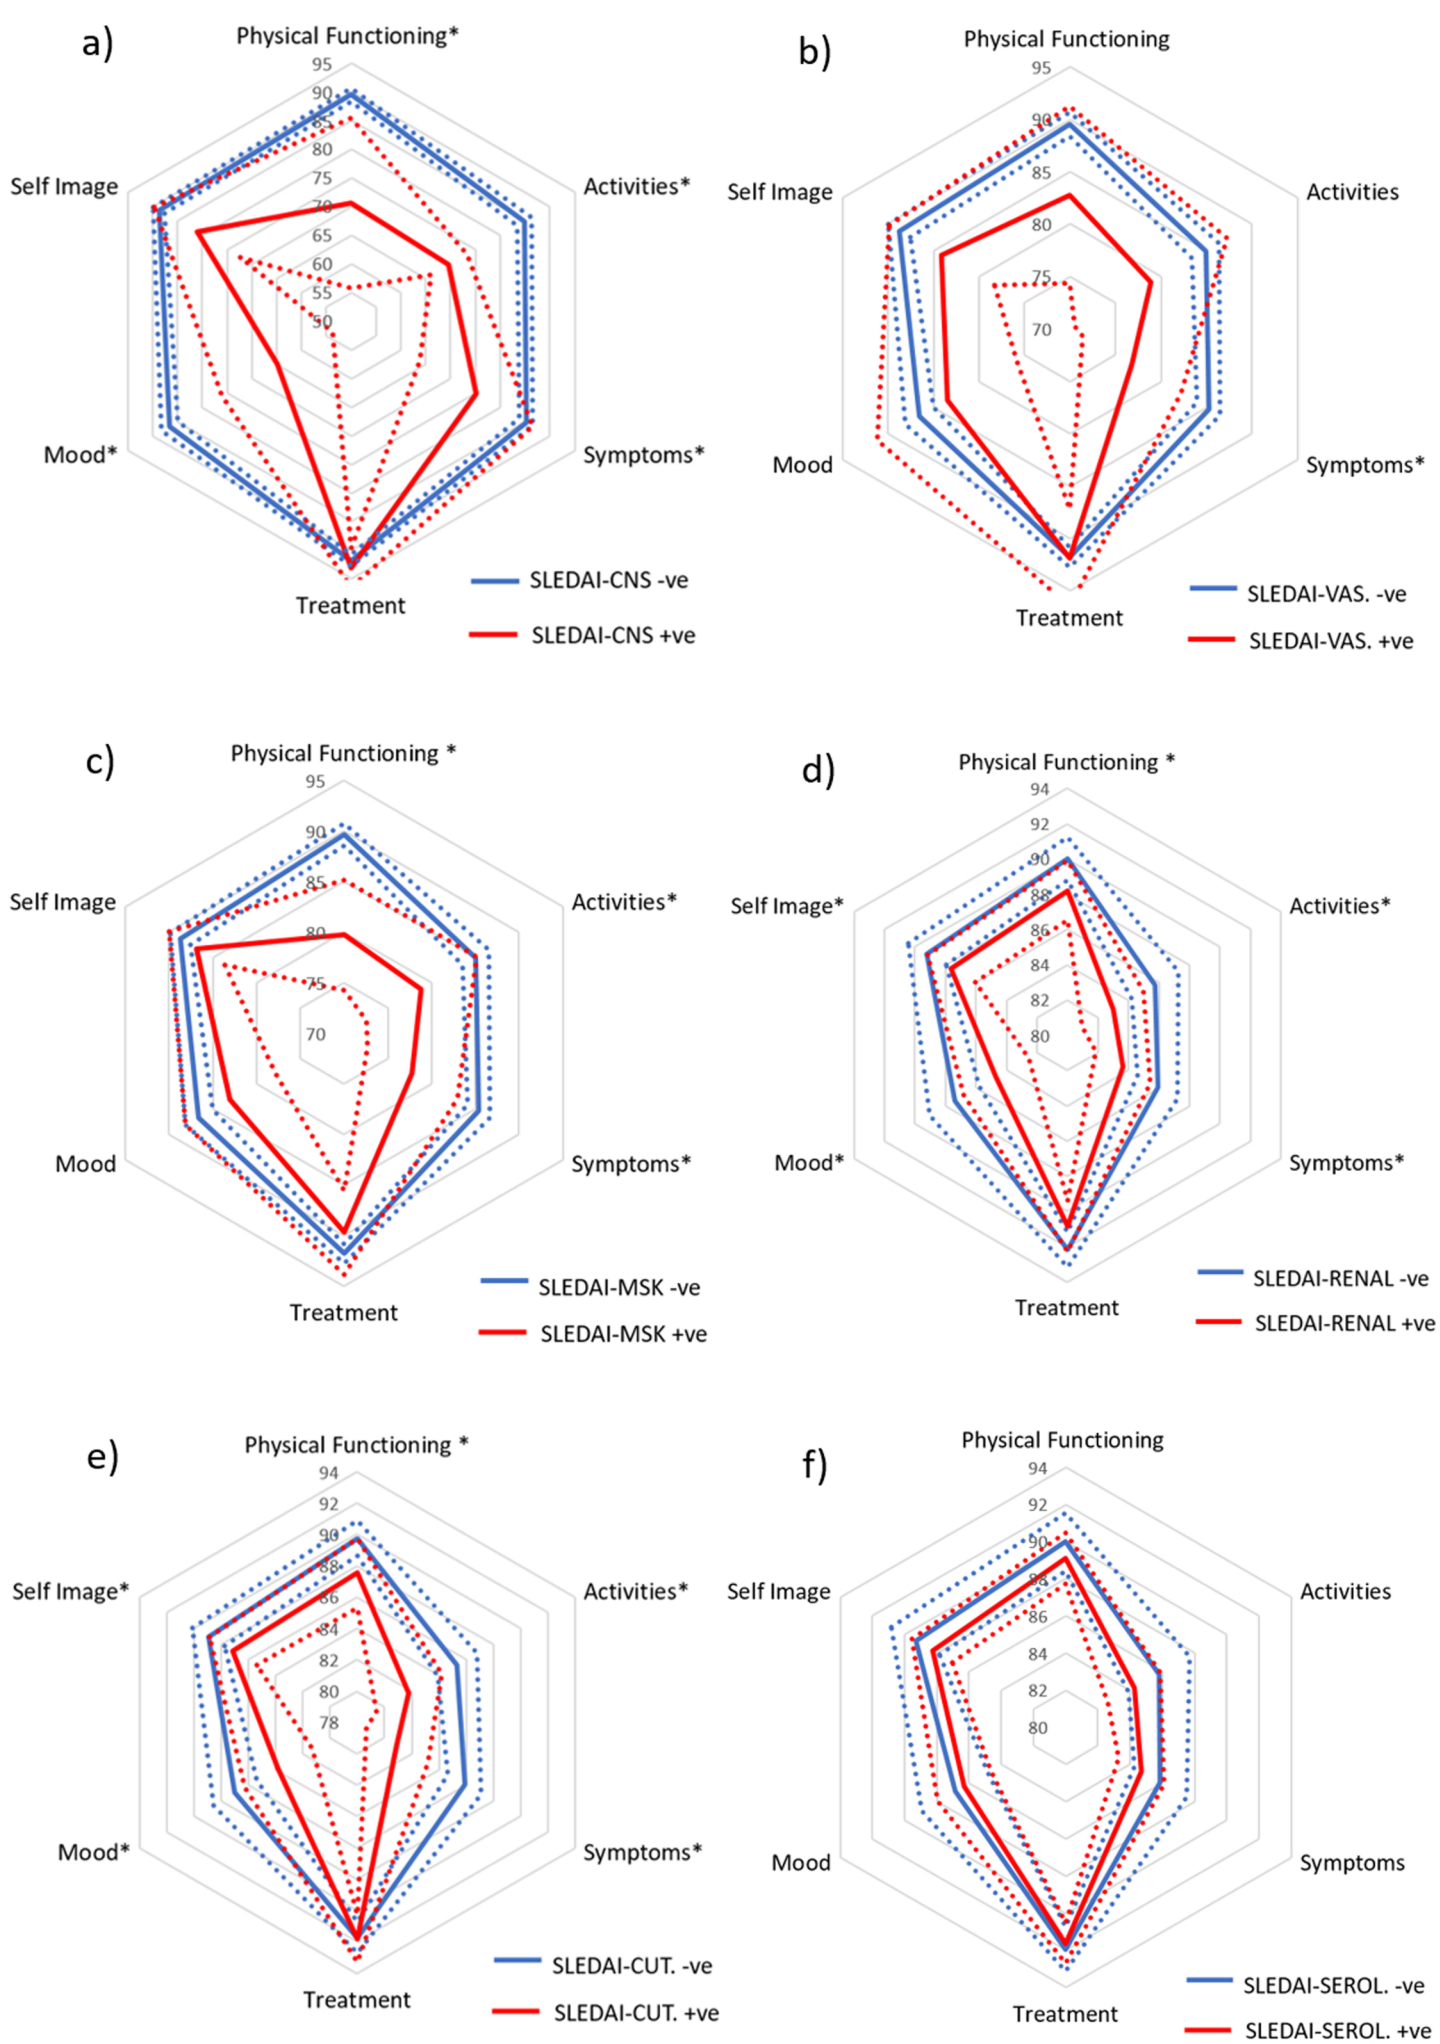

Supplement: 13075_2020_2095_MOESM3_ESM.pdf [file 13075_2020_2095_MOESM3_ESM.pdf]
